# Supplementary material for: A Staging Framework to Study Rice Female Gametophyte Development
Source: Research Square preprint supplement (doi:10.21203/rs.3.rs-7539123/v1), 2025-09-18
Supplement: Supplementary file 1 [file 5720f72d73d0aef5a99f5da4.xlsx]

## Sheet: Table S1
Table S1. Developmental marker genes associated with rice FG development, compiled from previous studies.
(a) Kubo et al. (2013)
Gene nane	MSU_ID	RAP_ID	Relative expression (Kubo, 2013)						Relative expression (Kim, 2025)						Annotation
			E1	E2	E3	E4	E5	E6	FG1	FG2	FG3	FG4	FG5	FG6
	LOC_Os03g17100	Os03g0279200	1	0.752312	0.824984	0.394123	0.229555	0.0669126	1	0.630696	0.329651	0.18763	0.347087	0.169258	Core histone H2A/H2B/H3/H4 domain containing protein, putative, expressed
OsXTR1	LOC_Os11g33270	Os11g0539200	0.337464	0.54389	1	0.152115	0.0142162	0.00613168	1	0.489544	0.140304	0.0512266	0.142874	0.135572	glycosyl hydrolases family 16, putative, expressed
OsSub53	LOC_Os07g39020	Os07g0578300	0.00369311	0.00238679	0.000207898	0.395806	1	0.480244	0.000115906	0.00370898	0.246481	0.458042	0.628076	1	OsSub53 - Putative Subtilisin homologue, expressed
	LOC_Os04g53950	Os04g0631200	1	0.998833	0.6665	0.119055	0.0353295	0.00746333	1	0.575486	0.204608	0.103038	0.109105	0.0523256	glycosyl hydrolases family 16 protein, protein, expressed
	LOC_Os02g16730	Os02g0267200	0.190736	0.0347499	0.00275943	0.159417	0.230056	1	0.00149729	0.00149729	0.178177	0.335205	0.597792	1	expansin precursor, putative, expressed
Os7bglu26	LOC_Os07g46280	Os07g0656200	0.0195142	0.0205092	0.023703	0.632983	0.981641	1	0.606161	0.759147	0.905187	1	0.813417	0.948522	Os7bglu26 - beta-mannosidase/glucosidase/exoglucanase, expressed
OsCUC1	LOC_Os06g23650	Os06g0344900	1	0.263363	0.027702	0.00289691	0.00204068	0.000761388	1	0.513598	0.266511	0.132867	0.128982	0.210567	no apical meristem protein, putative, expressed
OsARP/OsCTP	LOC_Os02g26700	Os02g0465900	0.107256	0.0667842	0.110663	0.384964	0.462143	1	0.106844	0.231006	0.746528	0.958098	0.949526	1	cation transport regulator-like protein 1, putative, expressed
Ehd2/RID1	LOC_Os10g28330	Os10g0419200	0.0160678	0.13798	0.326129	1	0.877783	0.886407	0.09519	0.569122	0.93219	0.745039	0.937908	1	ZOS10-04 - C2H2 zinc finger protein, expressed
	LOC_Os10g20650	Os10g0347000	1	0.620121	0.416362	0.218996	0.140124	0.0226562	1	0.627384	0.351013	0.204786	0.156864	0.0789438	glucan endo-1,3-beta-glucosidase-related, putative, expressed
	LOC_Os03g30300	Os03g0416500	0.082659	0.184062	0.217891	0.42315	0.563806	1	0.223469	0.42001	0.895362	0.885732	0.838283	1	6-phosphogluconolactonase, putative, expressed
	LOC_Os11g44810	Os11g0671000	0.0287741	0.043791	0.0847637	0.555899	0.820463	1	0.202522	0.449136	0.783962	0.820469	0.889441	1	auxin-repressed protein, putative, expressed
	LOC_Os03g17760	Os03g0286500	0.0981655	0.556922	1	0.44158	0.233785	0.0897076	0.700953	1	0.477608	0.34412	0.360012	0.272754	RNA recognition motif containing protein, putative, expressed
OsNRAMP3	LOC_Os06g46310	Os06g0676000	0.0490007	0.064344	0.14266	0.493244	0.608545	1	0.507318	0.696826	0.986916	0.924064	1	0.98774	metal transporter Nramp6, putative, expressed
	LOC_Os07g42220	Os07g0613800	1	0.632896	0.00328875	0.01935	0.0185159	0.00137057	1	0.861593	0.747886	0.567646	0.715843	0.712728	expressed protein
	LOC_Os03g47730	Os03g0680700	0.417228	0.475666	1	0.421489	0.145269	0.07075	0.951913	1	0.520583	0.479053	0.324954	0.108561	homeobox domain containing protein, expressed
	LOC_Os12g38120	Os12g0568900	0.0106032	0.00679594	0.00138531	0.931936	1	0.0037575	0.425183	0.40127	1	0.333063	0.0886354	0.0483032	thaumatin family domain containing protein, expressed
MSP1	LOC_Os01g68870	Os01g0917500	1	0.959966	0.764305	0.335304	0.259683	0.104599	1	0.743392	0.575597	0.446183	0.321368	0.18376	leucine-rich repeat receptor protein kinase EXS precursor, putative, expressed
OsMER3/OsRCK	LOC_Os02g40450	Os02g0617500	1	0.853551	0.868788	0.899454	0.894132	0.624561	0.763875	1	0.830979	0.855701	0.765893	0.623108	DEAD/DEAH box helicase domain containing protein, expressed
PAIR1	LOC_Os03g01590	Os03g0106300	1	0.762921	0.486973	0.389579	0.26073	0.170594	1	0.807266	0.363838	0.230172	0.275097	0.141986	PAIR1, putative, expressed
OsSDS	LOC_Os03g12414	Os03g0225200	1	0.996562	0.718243	0.215632	0.228612	0.126978	1	0.874832	0.658143	0.491252	0.442799	0.324361	cyclin, putative, expressed
OsTOP6A1	LOC_Os03g54091	Os03g0752200	0.857158	0.607454	0.641806	1	0.867059	0.598622	0.91295	0.880172	0.873366	1	0.760702	0.624754	OsTOP6A1 - Topoisomerase 6 subunit A homolog 1, expressed
MEL1	LOC_Os03g58600	Os03g0800200	1	0.0936239	0.061557	0.0376579	0.0379439	0.0142334	1	0.43905	0.205728	0.208697	0.133077	0.0719525	PAZ domain containing protein, putative, expressed
ZEP1	LOC_Os04g37960	Os04g0452500	0.581123	0.960948	1	0.797029	0.50677	0.204934	0.947622	1	0.718332	0.655799	0.460182	0.315339	synaptonemal complex protein 2, putative, expressed
OsRad21-4	LOC_Os05g50410	Os05g0580500	1	0.651871	0.960266	0.707205	0.526534	0.16202	0.695252	0.960271	0.9698	1	0.772448	0.735788	Rad21 / Rec8 like protein, putative, expressed
OsPol lambda	LOC_Os06g13020	Os06g0237200	0.581896	0.659231	0.512546	0.716349	0.830549	1	0.699088	0.79213	0.898254	1	0.849517	0.707527	DNA polymerase lambda, putative, expressed
PAIR2	LOC_Os09g32930	Os09g0506800	0.416497	0.797919	0.784784	0.761772	1	0.858391	0.791444	0.888261	0.888206	1	0.716371	0.582344	retrotransposon protein, putative, SINE subclass, expressed
PAIR3	LOC_Os10g26560	Os10g0405500	0.617275	1	0.797568	0.429122	0.433578	0.203059	1	0.987706	0.585478	0.391856	0.399923	0.298886	expressed protein
DMC1B	LOC_Os11g04954	Os11g0146800	0.490373	1	0.577827	0.439737	0.327713	0.188298	1	0.89457	0.919457	0.866063	0.725339	0.728054	DNA repair protein Rad51, putative, expressed
DMC1A	LOC_Os12g04980	Os12g0143800	0.653159	0.905176	0.40018	1	0.865266	0.534657	0.629242	0.906755	0.840787	0.838249	0.805265	1	DNA repair protein Rad51, putative, expressed
MEL2	LOC_Os12g38460	Os12g0572800	0.523465	0.640763	0.865598	1	0.928823	0.585485	0.559288	0.94658	1	0.791582	0.626467	0.428976	RNA recognition motif family protein, expressed
(b) Wu et al. (2015)
Gene nane	MSU_ID	Relative expression (Wu, 2015)			Relative expression (Kim, 2025)						Annotation
		OVR1	OVR2	OVR3	FG1	FG2	FG3	FG4	FG5	FG6
	LOC_Os05g41060	0.152213	0.641597	1	0.45161	0.617893	0.916093	1	0.97539	0.906101	ADP-ribosylation factor, putative, expressed
rpL32_8.1	LOC_Os08g41300	0.375778	1	0.862695	1	0.991732	0.763882	0.812179	0.876967	0.805261	60S ribosomal protein L32, putative, expressed
RAMY	LOC_Os01g15270	0.346467	1	0.180614	0.0829735	0.15706	0.392938	0.477492	0.630257	1	expressed protein
	LOC_Os10g32820	0.472779	1	0.787216	0.999305	0.977225	0.833636	0.889453	1	0.888629	60S ribosomal protein L21-2, putative, expressed
OsPCNA	LOC_Os02g56130	1	0.33855	0.953528	1	0.905663	0.567989	0.532042	0.545707	0.406272	PCNA - Putative DNA replicative polymerase clamp, expressed
OsRACK1B	LOC_Os05g47890	0.507263	1	0.960149	0.73027	0.727993	0.803614	0.85955	1	0.898243	WD domain, G-beta repeat domain containing protein, expressed
OsPIN1a	LOC_Os06g12610	1	0.0193017	0.046685	0.970079	1	0.33622	0.358268	0.211811	0.189764	auxin efflux carrier component, putative, expressed
OsPIN1b	LOC_Os02g50960	1	0.100582	0.201539	1	0.603238	0.277424	0.223395	0.169183	0.146444	auxin efflux carrier component, putative, expressed
OsPIN1c	LOC_Os11g04190	1	0.022943	0.0491046	1	0.554043	0.182951	0.121813	0.0964356	0.049256	auxin efflux carrier component, putative, expressed
OsPIN1d	LOC_Os12g04000	1	0.020233	0.000157456	1	0.407558	0.0633654	0.0298094	0.0201987	0.00211761	auxin efflux carrier component, putative, expressed
OsYUCCA3	LOC_Os01g53200	1	0.351415	0.70795	0.649796	0.570552	0.678425	1	0.662577	0.341002	flavin monooxygenase, putative, expressed
OsMET1b	LOC_Os07g08500	1	0.208053	0.507031	1	0.952148	0.455855	0.324305	0.291997	0.182477	C-5 cytosine-specific DNA methylase, putative, expressed
OsPUP7	LOC_Os05g48300	0.00043852	0.866076	1	0.0106932	0.0129056	0.128564	0.257252	0.561701	1	purine permease, putative, expressed
	LOC_Os07g13810	0.76199	0.888605	1	0.551026	0.622874	0.702933	0.813783	1	0.96305	cytokinin-N-glucosyltransferase 1, putative, expressed
(c) Zhao et al. (2020)
Gene nane	MSU_ID	Relative expression (Zhao, 2020)				Relative expression (Kim, 2025)						Annotation
		AC	MMC	FM	MO	FG1	FG2	FG3	FG4	FG5	FG6
	LOC_Os01g01870	1	0.885496	0.663168	0.305821	0.7741	0.56925	0.540241	0.370054	0.512645	1	helix-loop-helix DNA-binding domain containing protein, expressed
OsMYB3R1-L	LOC_Os01g12860	1	0.739826	0.678295	0.352229	1	0.985765	0.648704	0.430478	0.476233	0.34456	MYB family transcription factor, putative, expressed
DWT1	LOC_Os01g47710	1	0.896989	0.223794	0.0214001	1	0.482853	0.251029	0.120027	0.156379	0.154321	homeobox domain containing protein, expressed
OsNAC4	LOC_Os01g60020	0.24182	1	0.910165	0.148693	0.1675	0.153008	0.328362	0.348137	0.574728	1	NAC domain transcription factor, putative, expressed
OsWRKY24	LOC_Os01g61080	0.157188	1	0.319631	0.00280276	0.290491	0.167189	0.199582	0.394984	0.404389	1	WRKY24, expressed
	LOC_Os01g64360	0.163791	1	0.46385	0.108829	0.336406	0.364866	0.42379	0.300531	0.30474	1	MYB family transcription factor, putative, expressed
OsEREBP2	LOC_Os01g64790	0.234342	1	0.5095	0.0425757	0.2746	0.139434	0.244399	0.225277	0.40041	1	AP2 domain containing protein, expressed
OsbZIP18	LOC_Os02g10860	1	0.857402	0.536785	0.162579	0.97056	0.478632	1	0.887464	0.746439	0.874644	bZIP transcription factor domain containing protein, expressed
OsMyb1R	LOC_Os02g46030	0.165268	1	0.483538	0.0813428	0.103769	0.185225	0.402946	0.344887	0.42656	1	MYB family transcription factor, putative, expressed
PGL2/OsBUL1/OsbHLH173	LOC_Os02g51320	0.414135	1	0.569409	0.0345992	1	0.626638	0.257208	0.34633	0.550704	0.542431	helix-loop-helix DNA-binding domain containing protein, expressed
	LOC_Os02g52670	0.0814865	0.804296	1	0.0078418	1	0.268172	0.110132	0.104075	0.0176211	0.105176	AP2 domain containing protein, expressed
	LOC_Os03g20650	1	0.443211	0.340731	0.105744	1	0.697987	0.277405	0.199105	0.185682	0.212528	bZIP transcription factor domain containing protein, expressed
	LOC_Os03g21970	1	0.978968	0.421788	0.0418994	1	0.780384	0.594695	0.408328	0.280071	0.113613	basic helix-loop-helix domain containing protein, expressed
	LOC_Os03g42420	1	0.4	0.153314	0.0731988	1	0.518176	0.208882	0.19159	0.116526	0.0615052	B3 DNA binding domain containing protein, expressed
SP3/OsDOF15	LOC_Os03g55610	1	0.262278	0.189133	0.0574713	1	0.22284	0.179012	0.172222	0.0962963	0.0888889	dof zinc finger domain containing protein, putative, expressed
	LOC_Os03g56050	0.923188	1	0.374638	0.134058	1	0.800346	0.351772	0.228176	0.183232	0.11236	AP2-like ethylene-responsive transcription factor AINTEGUMENTA, putative, expressed
	LOC_Os04g37740	0.180051	1	0.555368	0.132713	0.671485	0.69908	0.879106	0.546649	0.60841	1	zinc finger, C3HC4 type domain containing protein, expressed
Osmyb4	LOC_Os04g43680	0.159221	1	0.498671	0.012599	0.734887	0.571711	0.519557	0.695377	0.302252	1	MYB family transcription factor, putative, expressed
OsMYB511/OsMYBR1	LOC_Os04g49450	0.196571	1	0.436093	0.300658	0.279121	0.414363	0.802567	1	0.869941	0.947557	MYB family transcription factor, putative, expressed
	LOC_Os04g49700	1	0.248971	0.12963	0.0720165	1	0.404372	0.185792	0.148322	0.10929	0.0835285	zinc finger, C3HC4 type domain containing protein, expressed
sh4/SHA1/SG5	LOC_Os04g57530	1	0.371074	0.308411	0.154282	1	0.584247	0.272183	0.261216	0.2667	0.183948	transcription factor, putative, expressed
OsWRKY67	LOC_Os05g09020	0.127077	1	0.959922	0.0469208	0.110529	0.164483	0.231829	0.17739	0.314993	1	WRKY67, expressed
OsWRKY7	LOC_Os05g46020	0.126383	1	0.843738	0.0540369	0.182894	0.312204	0.451318	0.400439	0.254057	1	WRKY7, expressed
OsMADS5	LOC_Os06g06750	1	0.730847	0.570269	0.080416	0.690127	0.815168	0.802537	0.682819	0.813624	1	OsMADS5 - MADS-box family gene with MIKCc type-box, expressed
	LOC_Os06g36680	1	0.375566	0.231364	0.204887	1	0.87583	0.804614	0.990412	0.662743	0.560787	homeobox domain containing protein, expressed
	LOC_Os06g40960	1	0.298013	0.109272	0.0231788	1	0.302795	0.188665	0.169255	0.0954969	0.131211	ZOS6-05 - C2H2 zinc finger protein, expressed
	LOC_Os06g42630	1	0.834761	0.329253	0.0979192	1	0.583854	0.391178	0.334998	0.418227	0.524345	B3 DNA binding domain containing protein, expressed
OsMADS30	LOC_Os06g45650	0.237875	1	0.993072	0.122402	0.790099	0.905941	1	0.741584	0.460396	0.786139	OsMADS30 - MADS-box family gene with MIKCc type-box, expressed
OsLHY	LOC_Os06g51260	1	0.38212	0.531002	0.0173035	0.486231	0.41768	1	0.820932	0.766369	0.907793	MYB family transcription factor, putative, expressed
OsMADS15|DEP	LOC_Os07g01820	1	0.357086	0.309848	0.0040032	1	0.417222	0.22836	0.139301	0.125832	0.164271	OsMADS15 - MADS-box family gene with MIKCc type-box, expressed
Crl5	LOC_Os07g03250	1	0.492635	0.116021	0.00317245	1	0.294896	0.0356761	0.0300641	0.00895243	0.00561197	AP2-like ethylene-responsive transcription factor PLETHORA 2, putative, expressed
	LOC_Os07g43580	0.495645	1	0.434924	0.145854	1	0.642237	0.707477	0.844313	0.55645	0.869307	MYB family transcription factor, putative, expressed
	LOC_Os07g47790	0.155152	1	0.240592	0.0168836	1	0.853684	0.46	0.993684	0.263158	0.295789	AP2 domain containing protein, expressed
OsbZIP62|OsFD7	LOC_Os07g48660	1	0.432979	0.117021	0.0308511	1	0.425346	0.261159	0.255908	0.112725	0.0939961	bZIP transcription factor domain containing protein, expressed
	LOC_Os08g01700	1	0.248965	0.0751035	0.00768776	1	0.271925	0.101825	0.0865215	0.0653325	0.0694526	basic helix-loop-helix family protein, putative, expressed
OsCCA1|Nhd1	LOC_Os08g06110	1	0.780553	0.847344	0.0334683	0.516636	0.580545	1	0.781387	0.735667	0.826589	MYB family transcription factor, putative, expressed
	LOC_Os08g06370	0.737826	1	0.40034	0.0781427	1	0.375068	0.189527	0.127197	0.100924	0.151839	MYB family transcription factor, putative, expressed
OsbHLH38	LOC_Os08g33590	0.487473	1	0.406863	0.228214	1	0.576087	0.455119	0.345372	0.336255	0.202665	basic helix-loop-helix, putative, expressed
OsIDD12	LOC_Os08g36390	1	0.281014	0.145345	0.03503	1	0.665067	0.507199	0.303865	0.235666	0.166961	ZOS8-07 - C2H2 zinc finger protein, expressed
OsHsfB2b	LOC_Os08g43334	1	0.282958	0.42949	0.0165365	0.833566	0.593007	0.692308	0.499301	0.276923	1	HSF-type DNA-binding domain containing protein, expressed
	LOC_Os09g13680	1	0.413966	0.412295	0.269295	1	0.828904	0.487179	0.350583	0.329138	0.275524	ZOS9-04 - C2H2 zinc finger protein, expressed
	LOC_Os09g24490	0.565947	1	0.261029	0.0710018	1	0.536204	0.229615	0.14264	0.110024	0.0713199	basic helix-loop-helix family protein, putative, expressed
	LOC_Os09g29360	1	0.29053	0.130508	0.0183242	1	0.572869	0.282864	0.235405	0.288744	0.273415	helix-loop-helix DNA-binding protein, putative, expressed
	LOC_Os09g38340	1	0.294798	0.0346821	0.15896	1	0.78866	0.247423	0.195876	0.131443	0.162371	ZOS9-17 - C2H2 zinc finger protein, expressed
	LOC_Os10g30719	0.495443	0.988699	1	0.302224	0.972998	0.85423	1	0.909743	0.505098	0.428059	MYB family transcription factor, putative, expressed
OsYABBY3|OsYAB4|TOB3	LOC_Os10g36420	1	0.449034	0.139241	0.0113258	1	0.579562	0.295623	0.242582	0.194177	0.0790059	YABBY domain containing protein, putative, expressed
OsHB86	LOC_Os10g39030	1	0.907258	0.714113	0.160887	0.77318	1	0.569408	0.312729	0.433211	0.366684	homeobox domain containing protein, expressed
OsERF096	LOC_Os10g41330	0.196754	1	0.431512	0.0166271	0.753731	1	0.221393	0.226368	0.156716	0.99005	AP2 domain containing protein, expressed
	LOC_Os11g06840	1	0.402857	0.194286	0.0428571	1	0.509732	0.189781	0.10219	0.329684	0.336983	ZOS11-01 - C2H2 zinc finger protein, expressed
	LOC_Os11g45750	0.900238	1	0.980998	0.0475059	0.616251	0.855994	0.967418	1	0.796862	0.674175	WRKY125, expressed
	LOC_Os11g45850	0.765472	0.883822	1	0	0.486673	0.630878	0.755166	1	0.802486	0.990267	WRKY61, expressed
OsMYB3R1	LOC_Os12g13570	1	0.819902	0.611722	0.257021	1	0.906694	0.481406	0.300428	0.379085	0.212306	MYB family transcription factor, putative, expressed
	LOC_Os12g37970	1	0.219373	0.139601	0.122507	1	0.809425	0.504661	0.363801	0.271621	0.230451	MYB family transcription factor, putative, expressed
